# Supplementary material
Source: publisher site journal article supplement (https://www.dovepress.com/article/305106)
Supplement: Supplementary file 1 [file get_supplementary_file.php]

# 1 Supplementary information

## 2 DLS analysis of DOX-loaded (C)TSLs

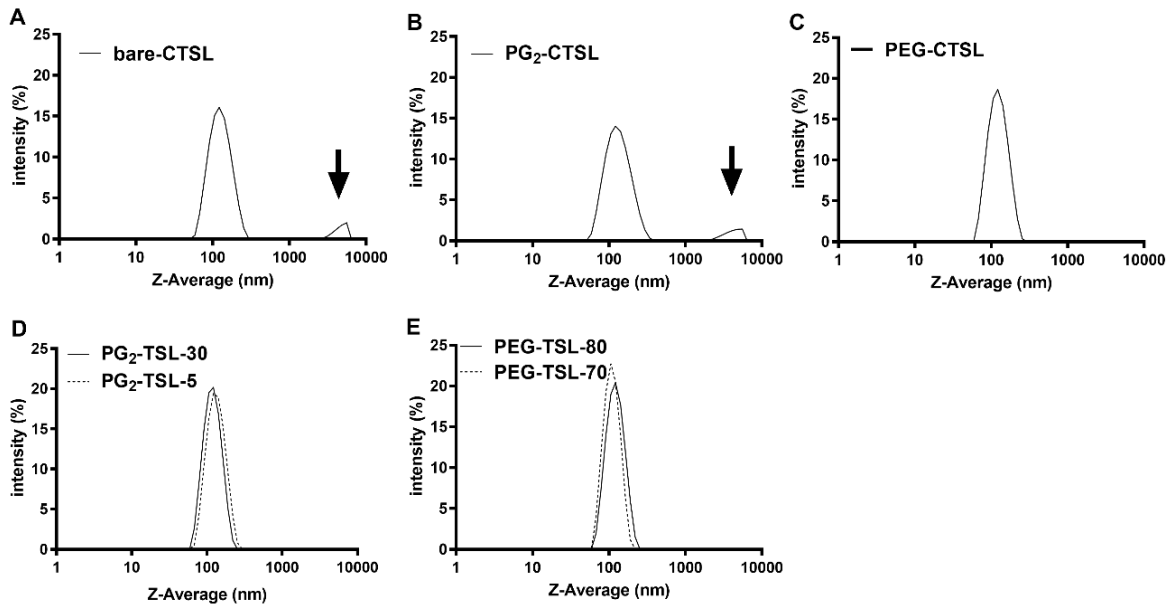

3

4 **Figure 1** Representative size distribution by DSL analysis of bare-CTSL (A), PG<sub>2</sub>-CTSL (B), PEG-CTSL

5 4 (C), PG<sub>2</sub>-TSLs (D), and PEG-TSLs (E). DOX-loaded liposomes were diluted 1:50 (v/v) in NaCl 0.9%

6 and 5 size measurement carried out via Zeta Sizer Nano SZ. Black arrows indicate presence of extra

7 peaks 6 appearing in size measurements with intensity distribution.

## 8 TSLs lipid composition analysis via thin layer chromatography

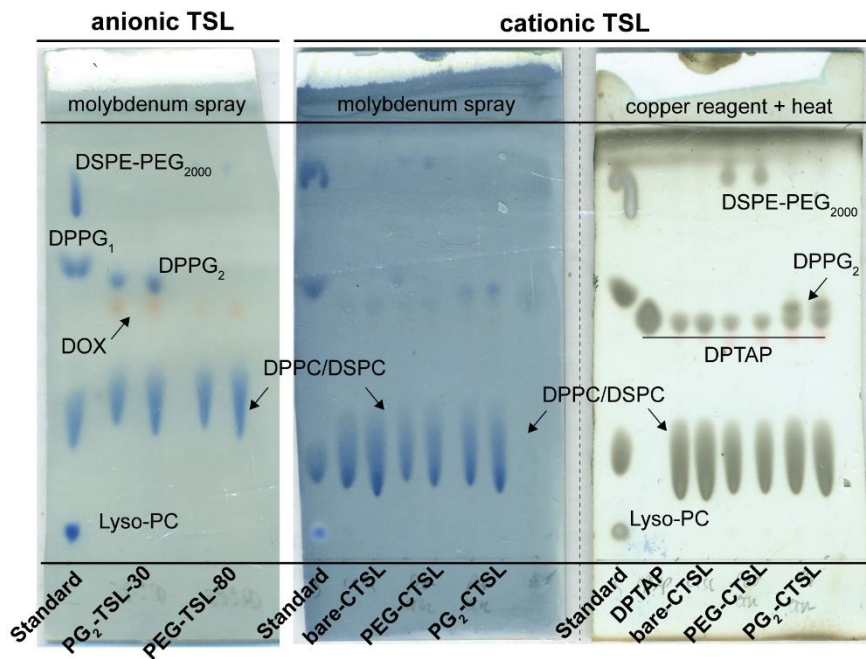

9

10 **Figure 2** Representative thin layer chromatography analysis of all (C)TSL formulations used in the  
11 study. A mobile phase composed of chloroform/methanol/acetic acid/H<sub>2</sub>O (100:60:10:5, vol:vol) was  
12 used to achieve lipid separation. A standard solution with Lyso-PC, DPPC/DSPC, DPPG and DSPE-  
13 PEG<sub>2000</sub> was used for lipid identification. The plates were stained either with molybdenum spray or with  
14 copper reagent. The latter was used exclusively for cationic formulation to allow analysis also of non-  
15 phosphate containing lipids (e.g., DPTAP).

16 Effect of protein adsorption on (C)TSLs-cell targeting

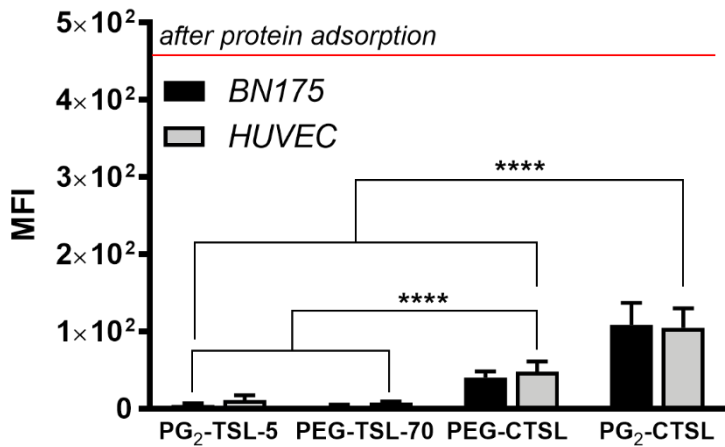

17

18 **Figure 3** Mean fluorescence intensity (MFI) of Iso-PE shift of BN175 cells and HUVEC after incubation  
19 with rhodamine-labeled (C)TSLs after protein adsorption. Liposomes were diluted 1:12 (v/v) in pre-  
20 centrifuged (75,000 x g, 1 hour) full FCS for 30 min at 37 °C. (C)TSLs with surface-adsorbed proteins  
21 were recovered via centrifugation (75,000 x g, 1 hour) and used in cell binding assay. ISO-PE  
22 fluorescence of untreated cells was subtracted from each sample and final MFI plotted as mean value  
23 ± SD for three independent measurements. Groups were analysed via one-way ANOVA followed by  
24 Bonferroni test, and asterisks indicate significant differences between groups. \*\*\*\* p < 0.0001.

25 Live cell fluorescence microscopy and bright field analysis

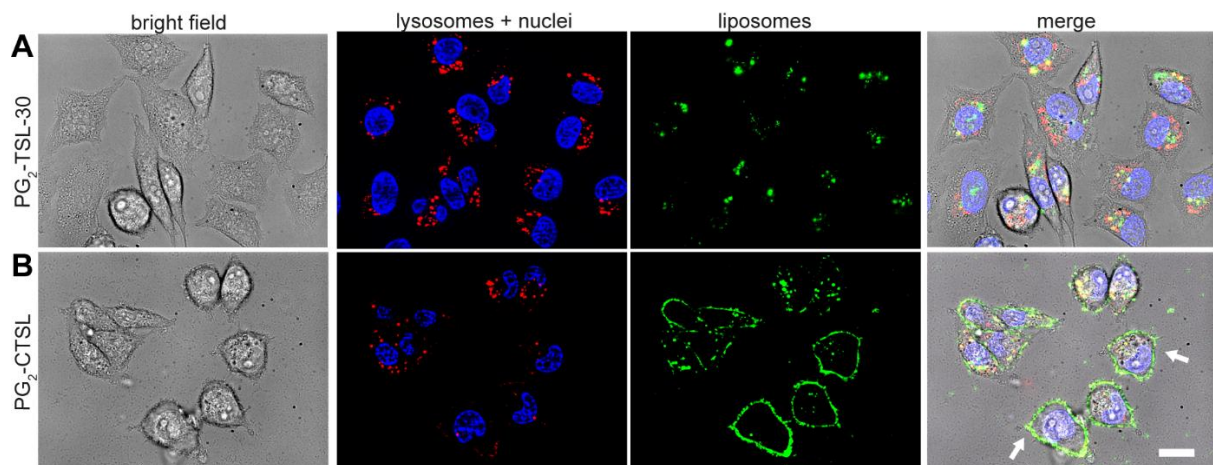

26

27 **Figure 4** Live cell fluorescence microscopy of BN175 incubated with anionic (**A**) and cationic (**B**) NBD-

28 labeled DPPG<sub>2</sub>-TSLs. Cells were imaged via bright field, DAPI (blue; nuclei), DsRed (red; lysosomes),

29 and GFP filter (green; liposomes). White arrows indicate presence of liposomes at the rim of the cells.

30 Scale bar applied to all images is 20  $\mu$ m.

31 Liposomes localization after HT application in cancer and endothelial cells

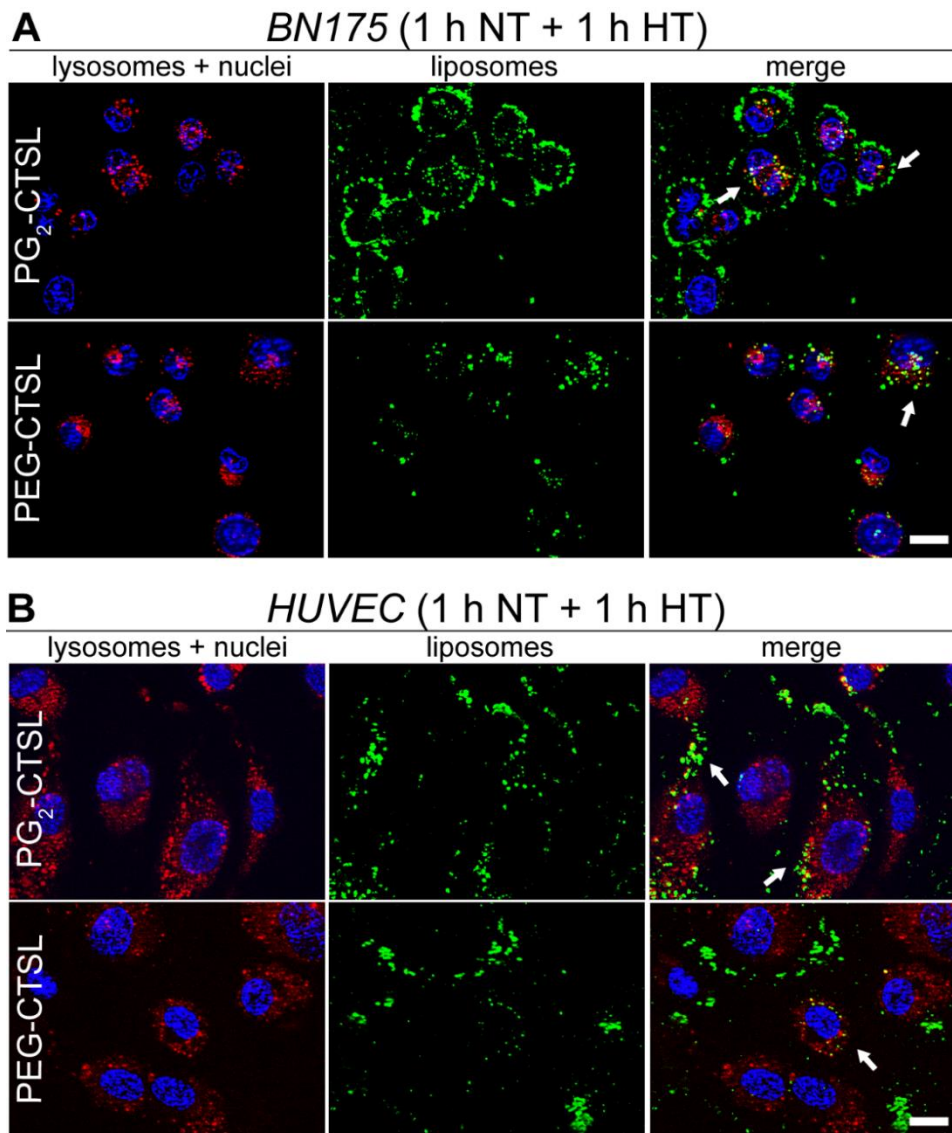

32

33 **Figure 5** Live cell fluorescence imaging on BN175 (A) and HUVEC (B) after HT application. NBD-  
34 liposome were imaged using GFP filter (green color), lysosomes with DsRed filter (LysoTracker RED,  
35 red color) and nuclei with DAPI filter (Hoechst 33342, blue). Arrows indicate co-localization (yellow) of  
36 liposomes (green) and lysosomes (red). Images were taken after 1 h 37 °C (NT) and 1 h at 41 °C (HT).  
37 Scale bar applied to all images is 20 μm.

38 *In vitro* cell toxicity of DOX-loaded (C)TSLs

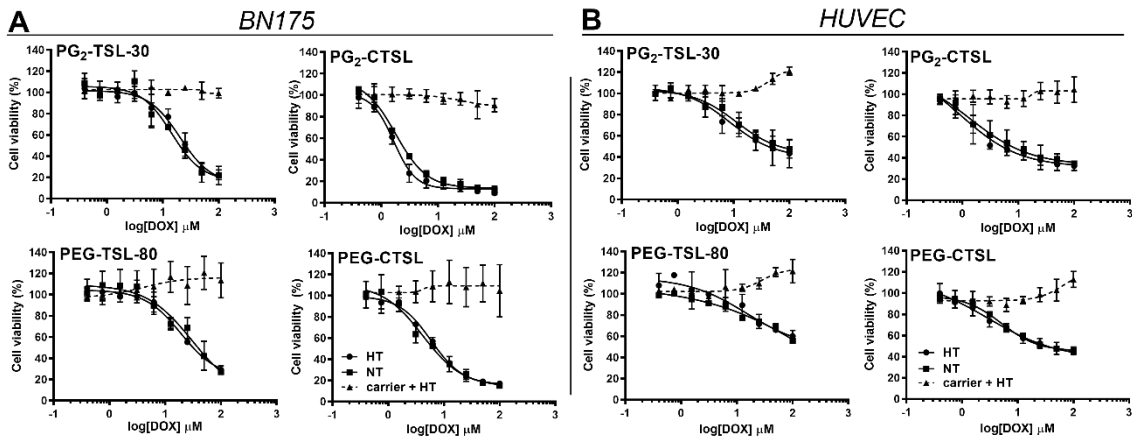

39

40 **Figure 6** *In vitro* cell toxicity of DOX-loaded (C)TSLs on BN175 (A) and HUVEC (B) cells. Cells were  
 41 treated with different concentrations of DOX (0.4 – 100 μM, log scale). Buffer-loaded (C)TSLs without  
 42 DOX (carrier) were tested in combination with HT condition and dosed using the DOX-corresponding  
 43 lipid concentration (0.04 – 2.22 mM; triangles, dashed line). Cell survival is expressed as percentage of  
 44 untreated cells (control). Data are presented as mean value ± SD for three independent analyses and  
 45 values were fit by a non-linear regression.

46

47 Hemocompatibility of DOX-loaded (C)TSLs

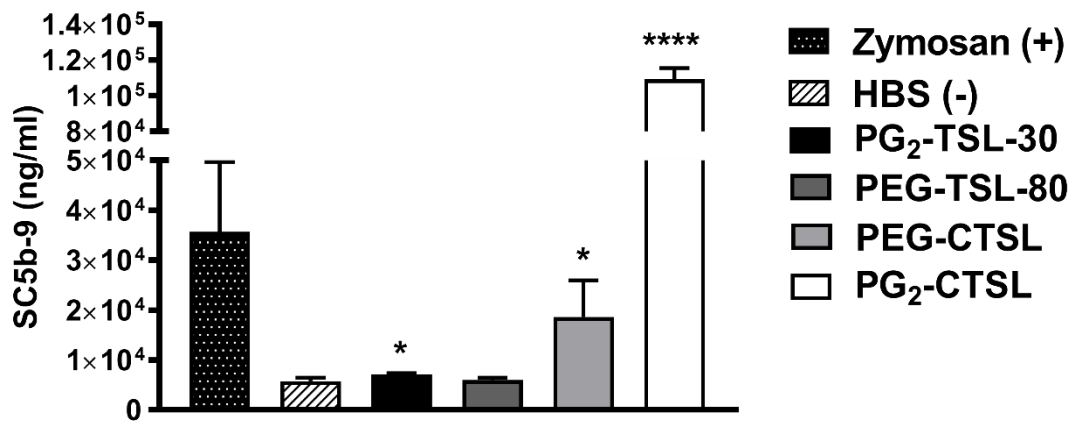

48

49 **Figure 7** Liposome-mediated complement activation *in vitro*. DOX-loaded (C)TSLs were diluted in  
50 normal human serum for complement activation analysis (1:12 v/v). Incubation was carried out at 37°C  
51 for 30 min, Zymosan and HBS pH 7.4 were used as positive and negative controls, respectively. ELISA  
52 test for SC5b-9 was carried out using the manufacturer's instructions. Values are expressed as average  
53 + SD for 3 independent measurements. Groups were analyzed via one-way ANOVA Bonferroni test for  
54 multiple comparison against control (HBS pH 7.4), and asterisks indicate significant difference between  
55 groups. \* p < 0.05, \*\*\*\* p < 0.0001.
